# Supplementary material for: Androgen-induced gut dysbiosis disrupts glucolipid metabolism and endocrinal functions in polycystic ovary syndrome
Source: PubMed Central journal article supplement (PMC8103748; doi:10.1186/s40168-021-01046-5), 2021-05-06
Supplement: 40168_2021_1046_MOESM2_ESM.pdf [file 40168_2021_1046_MOESM2_ESM.pdf]

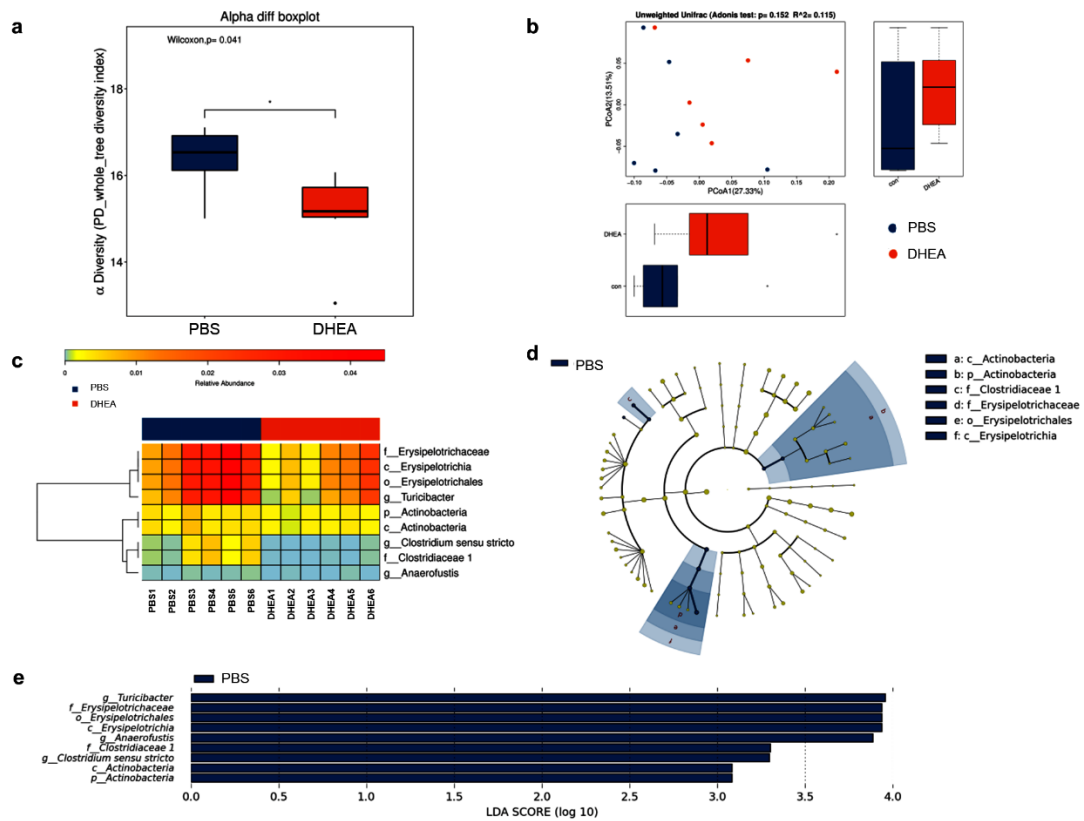

**Figure S1.** Microbial characteristics of DHEA-induced PCOS-like rats.

**a** Alpha diversity was presented by PD whole tree index. **b** Beta diversity was displayed by PCoA analysis with unweighted UniFrac distance. Numbers on the axes represent percentage of variation interpreted by that coordinate. **c** Heat map of differentially abundant taxa between samples from DHEA treated rats and controls. These taxa were identified by Wilcoxon test with  $p < 0.05$ . LefSe analysis results were displayed by cladogram (**d**) and LDA score bar plot (**e**). Differentially abundant taxa enriched in PBS group were represented by blue sectors or bars. Taxa with LDA score  $> 2$  were shown and regarded capable of discriminating groups.  $n=6$  rats each group.
