# Supplementary material for: Androgen-induced gut dysbiosis disrupts glucolipid metabolism and endocrinal functions in polycystic ovary syndrome
Source: PubMed Central journal article supplement (PMC8103748; doi:10.1186/s40168-021-01046-5), 2021-05-06
Supplement: 40168_2021_1046_MOESM4_ESM.pdf [file 40168_2021_1046_MOESM4_ESM.pdf]

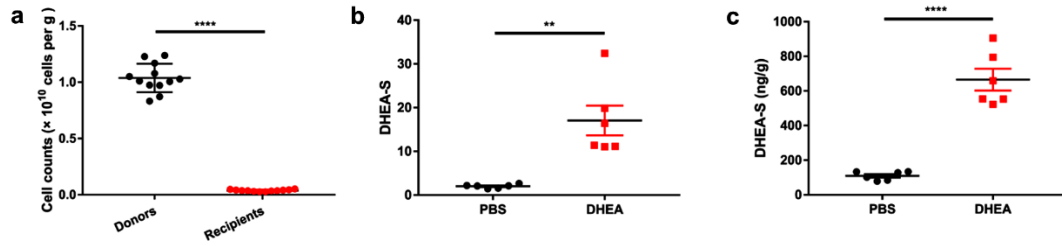

**Figure S3.** Transplant contents in FMT donors and gut circumstances in antibiotic-treated recipients before FMT initiation.

**a** Diagram of microbial loads in PBS-treated and DHEA-treated donors and antibiotic-treated recipients.

**b** Relative DHEA-S levels in the fecal samples from PBS-treated and DHEA- treated groups measured by untargeted metabolomic.

**c** Quantification of DHEA-S levels in two groups of donors using LCMSMS. n=6 each group.
